# Supplementary material for: PHOSPHORYLETHANOLAMINE CYTIDYLYLTRANSFERASE 1 modulates flowering in a florigen-independent manner by regulating SVP
Source: Oxford University Press journal article supplement (doi:10.1242/dev.193870), 2020-01-01
Supplement: dev193870supp.pdf [file dev193870supp.pdf]

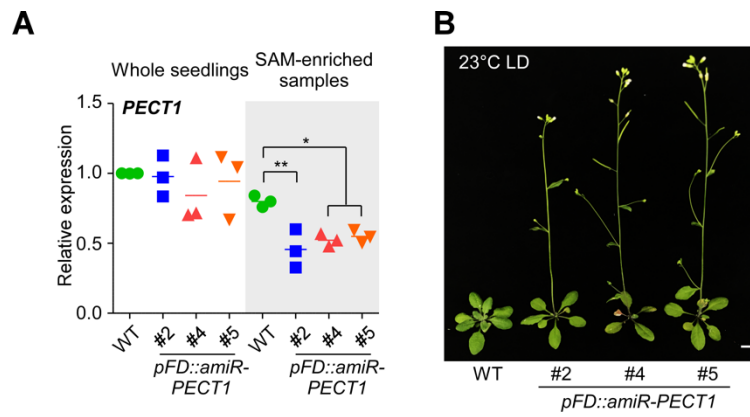

**Figure S1. (A)** The *PECT1* mRNA levels in whole seedlings and SAM-enriched samples at 23°C (ZT8) under SD conditions. **(B)** Morphology of *pFD::amiR-PECT1* plants grown under 23°C LD conditions. Asterisks represent significant differences derived from one-way ANOVA followed by Dunnett's multiple comparison tests (\*:  $P \leq 0.05$ , \*\*:  $P \leq 0.01$ ).

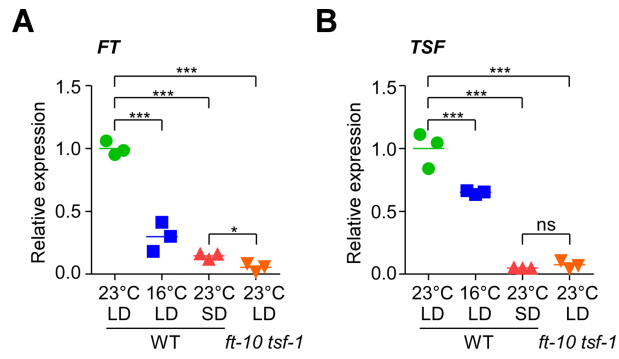

**Figure S2.** *FT* (A) and *TSF* (B) mRNA levels under different conditions (23°C LD, 16°C LD, and 23°C SD). Asterisks represent significant differences from Student's *t*-tests (ns: non-significant, \*:  $P \leq 0.05$ , \*\*\*:  $P \leq 0.001$ ).

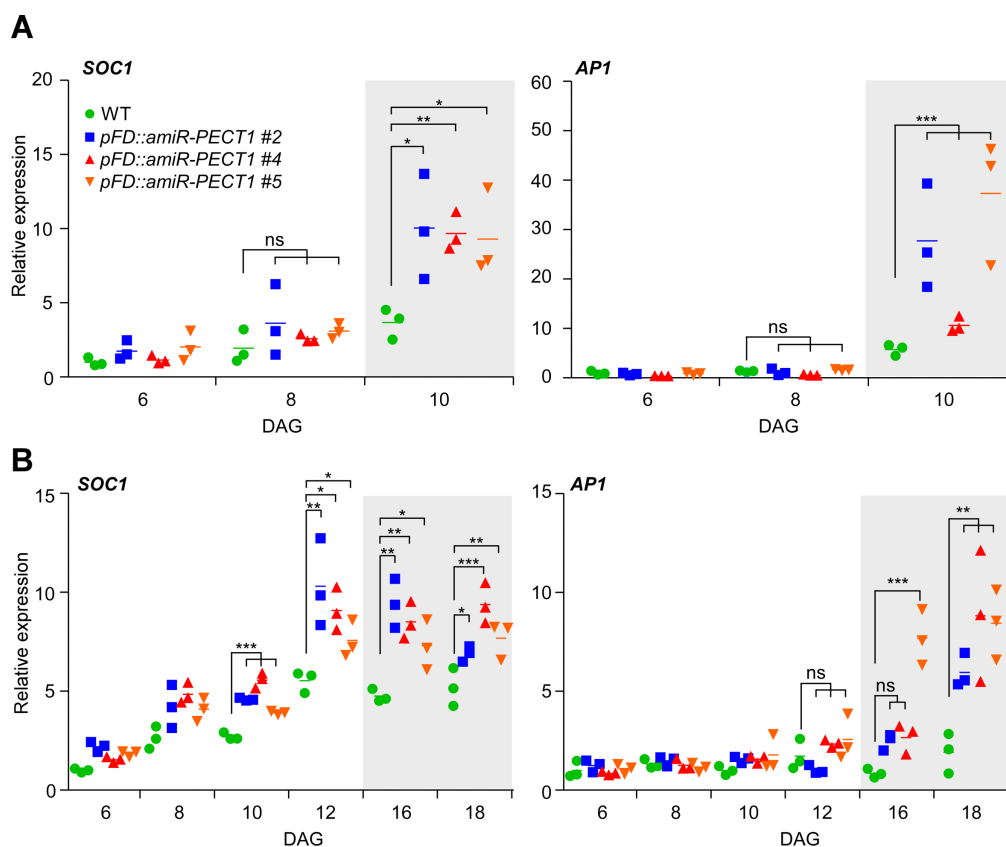

**Figure S3.** Time course of *SOC1* and *AP1* mRNA levels in *pFD::amiR-PECT1* plants under 23°C LD (ZT16) (A) and 23°C SD (ZT8) (B) conditions. Asterisks represent significant differences from one-way ANOVA followed by Dunnett's multiple comparison tests (ns: non-significant, \*:  $P \leq 0.05$ , \*\*:  $P \leq 0.01$ , \*\*\*:  $P \leq 0.001$ ).

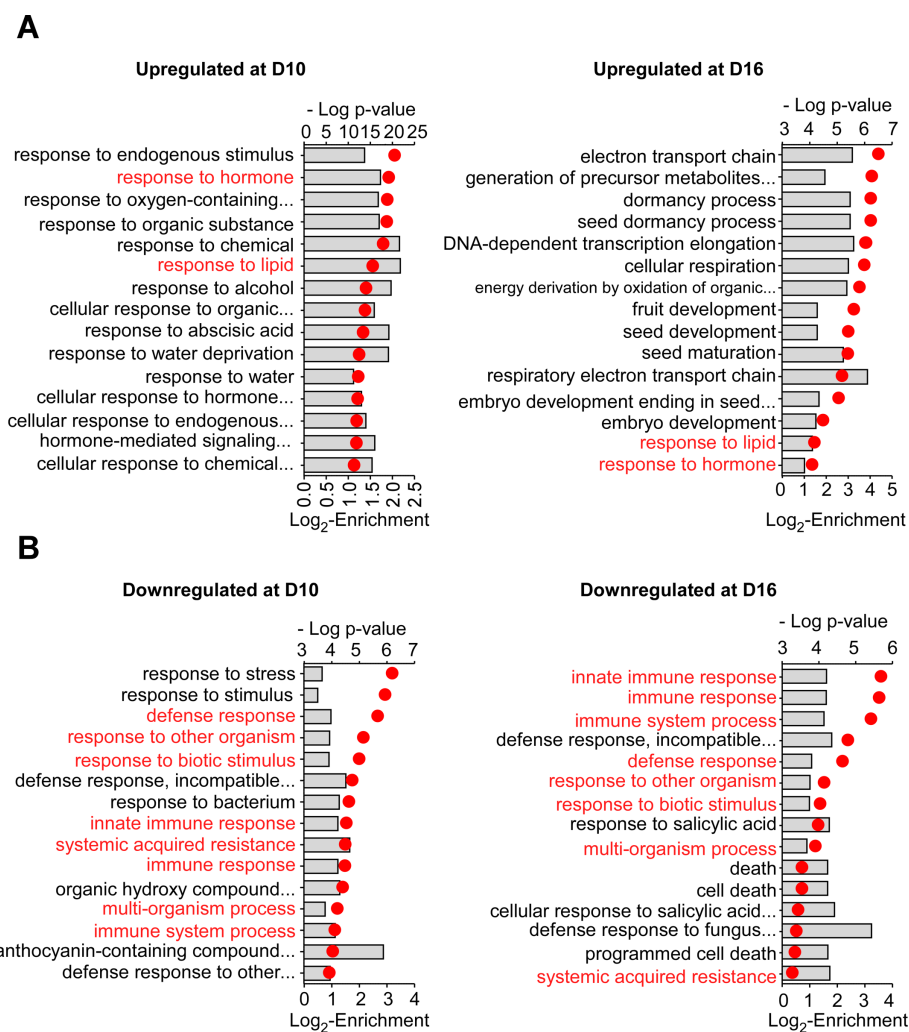

**Figure S4.** Top 15 GO terms enriched among the genes that were upregulated (**A**) and downregulated (**B**) in the SAM-enriched sample of 10- and 16-day-old *pFD::amiR-PECT1* plants (line #5). Y-axis represents GO terms; the primary X-axis represents  $\log_2$  enrichment (grey bars), whereas the secondary X-axis shows the negative log of  $P$  values (red filled circles). Red color indicates GO terms present at both 10 and 16 days after germination.

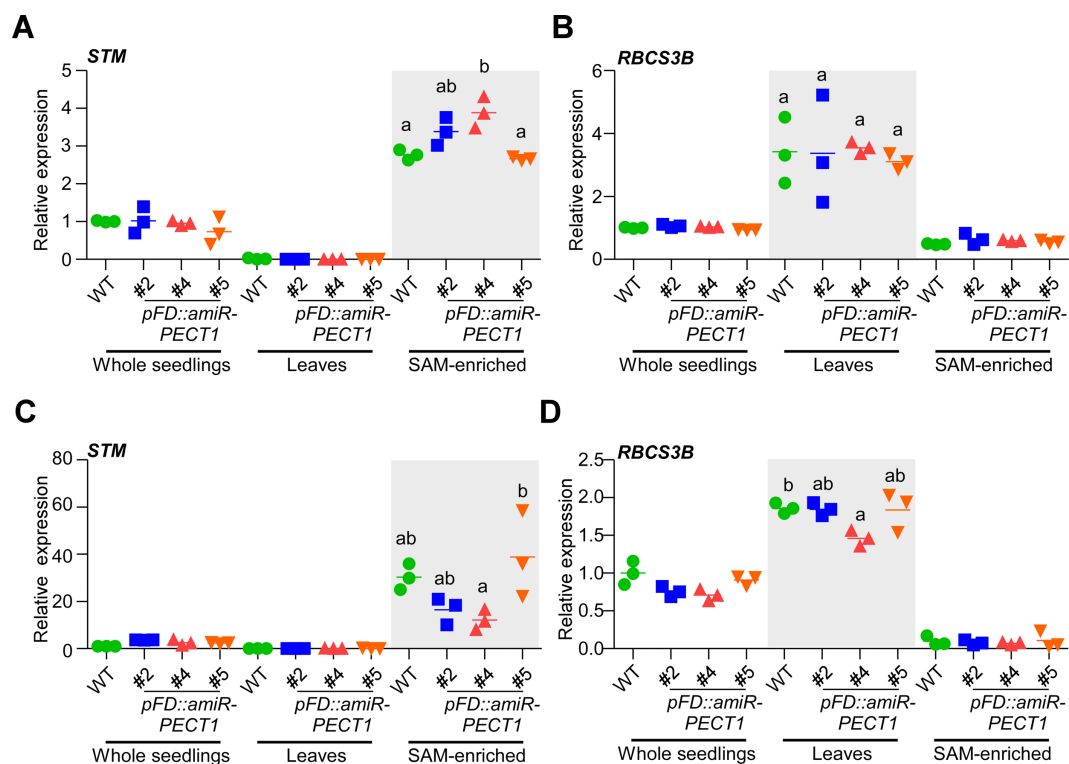

**Figure S5.** The mRNA levels of marker genes *STM* and *RBCS3B* in the samples from Fig. 3A and C (A–B) and Fig. S6 (C–D). Letters indicate significant difference from one-way ANOVA followed by Duncan’s multiple range tests ( $P \leq 0.01$ ).

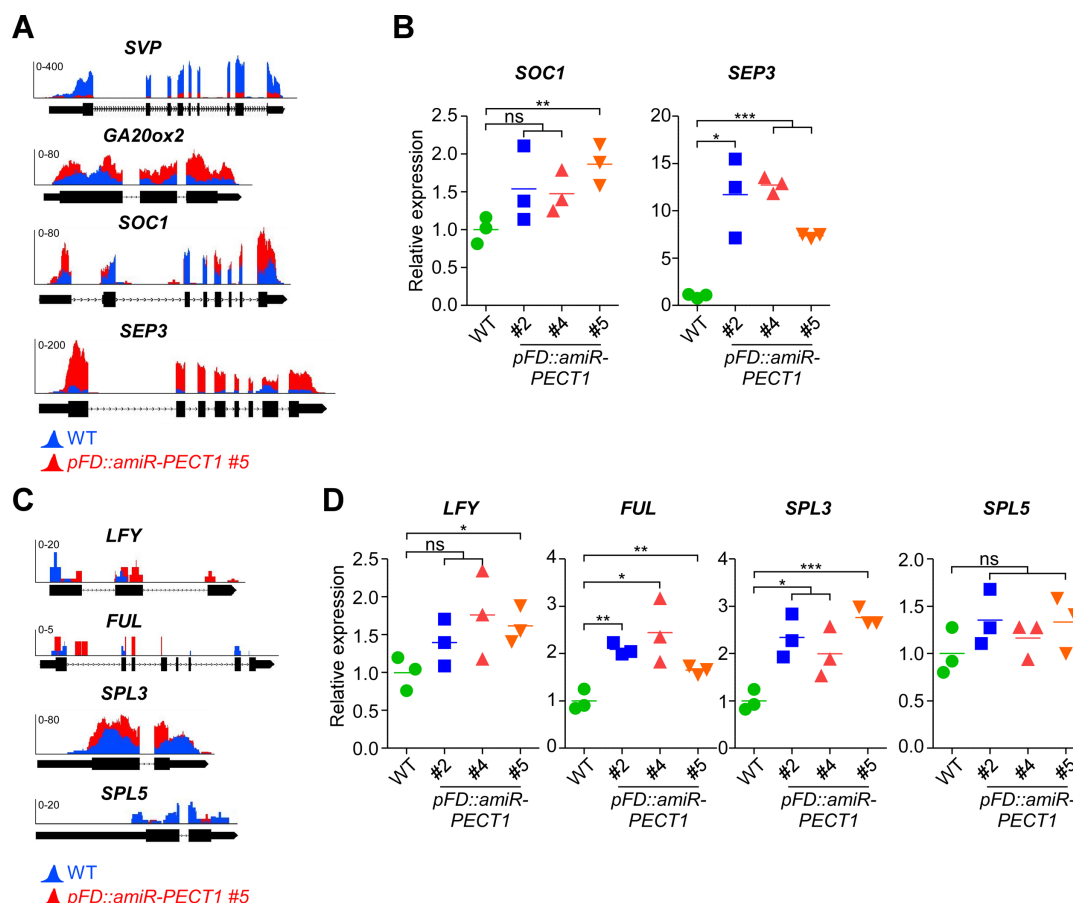

**Figure S6.** (A) The RNA-seq peak map of *SVP*, *GA20ox2*, *SOC1*, and *SEP3* in the SAM-enriched samples of 10-day-old WT (blue) and *pFD::amiR-PECT1* plants (line #5) (red). (B) The mRNA levels of *SOC1* and *SEP3* in the SAM-enriched samples of *pFD::amiR-PECT1* plants under 23°C SD conditions (ZT8). (C) The RNA-seq peak map of GA-downstream target genes, *LFY*, *FUL*, *SPL3*, and *SPL5*, in the SAM-enriched samples of 10-day-old WT (blue) and *pFD::amiR-PECT1* plants (line #5) (red). (D) The mRNA levels of *LFY*, *FUL*, *SPL3*, and *SPL5* in the SAM-enriched samples of *pFD::amiR-PECT1* plants under 23°C SD conditions (ZT8). Asterisks represent significant differences derived from Student's *t*-tests (ns: non-significant, \*:  $P \leq 0.05$ , \*\*:  $P \leq 0.01$ , \*\*\*:  $P \leq 0.001$ ).

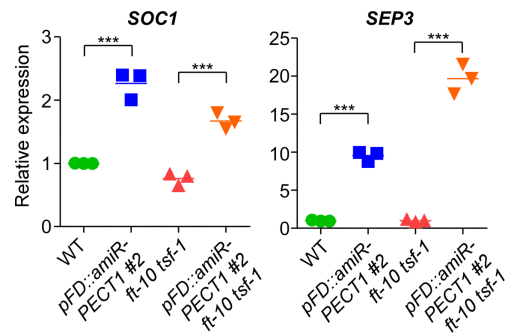

**Figure S7.** The mRNA levels of *SOC1* and *SEP3* in *pFD::amiR-PECT1 ft-10 tsf-1* seedlings under 23°C SD conditions (ZT8). Asterisks represent significant differences derived from Student's *t*-tests (ns: non-significant, \*:  $P \leq 0.05$ , \*\*:  $P \leq 0.01$ , \*\*\*:  $P \leq 0.001$ ).

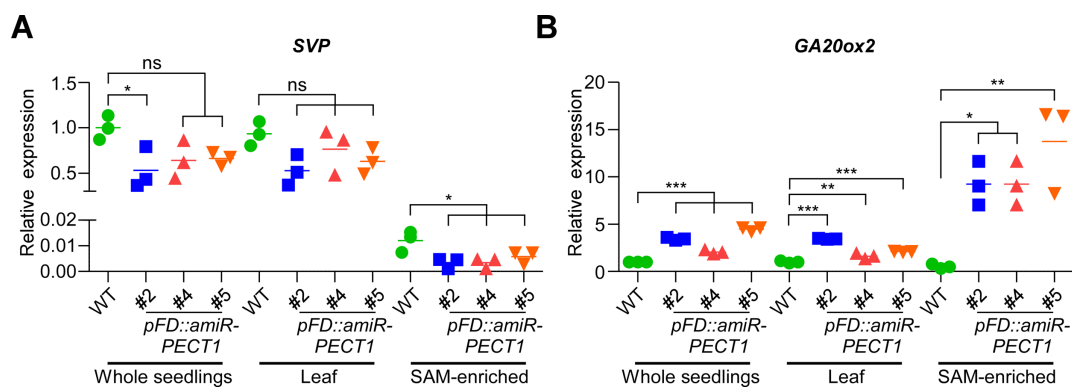

**Figure S8.** The mRNA levels of *SVP* (**A**) and *GA20ox2* (**B**) in whole seedlings, leaves, and SAM-enriched samples of *pFD::amiR-PECT1* plants at 23°C (ZT16) under LD conditions. Asterisks represent significant differences derived from one-way ANOVA followed by Dunnett's multiple comparison tests (ns: non-significant, \*:  $P \leq 0.05$ , \*\*:  $P \leq 0.01$ , \*\*\*:  $P \leq 0.001$ ).



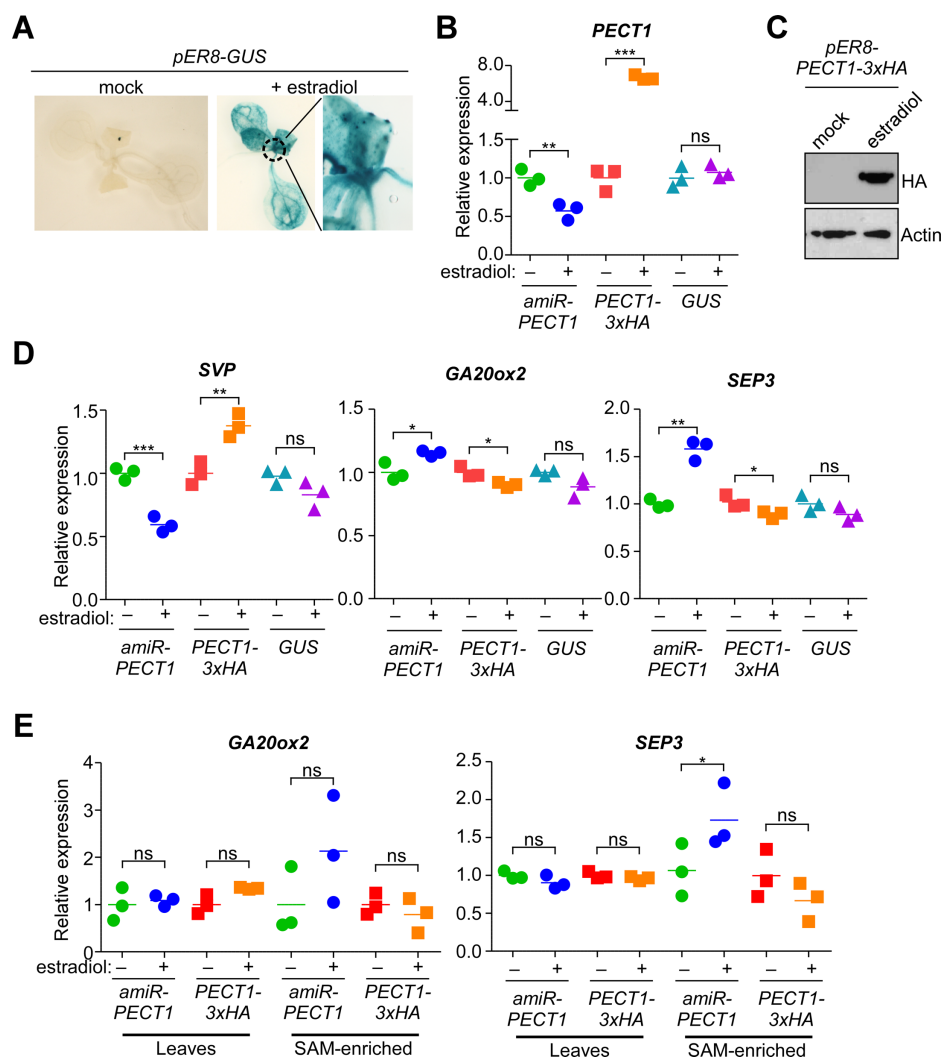

**Figure S9.** (A) GUS histochemical analyses of *pER8::GUS* plants upon estradiol treatment. (B) The mRNA levels of *PECT1* in *pER8::amiR-PECT1*, *pER8::PECT1:3xHA*, and *pER8::GUS* seedlings upon estradiol treatment. (C) The levels of *PECT1:3xHA* protein in *pER8::PECT1:3xHA* plants upon estradiol treatment. (D–E) The mRNA levels of *SVP*, *GA20ox2*, and *SEP3* in whole seedlings (D) and in SAM-enriched and leaf samples (E) of *pER8::amiR-PECT1*, *pER8::PECT1:3xHA*, and *pER8::GUS* seedlings upon estradiol treatment under 23°C SD conditions (ZT8). Asterisks represent significant differences derived from Student's *t*-tests (ns: non-significant, \*:  $P \leq 0.05$ , \*\*:  $P \leq 0.01$ , \*\*\*:  $P \leq 0.001$ ).

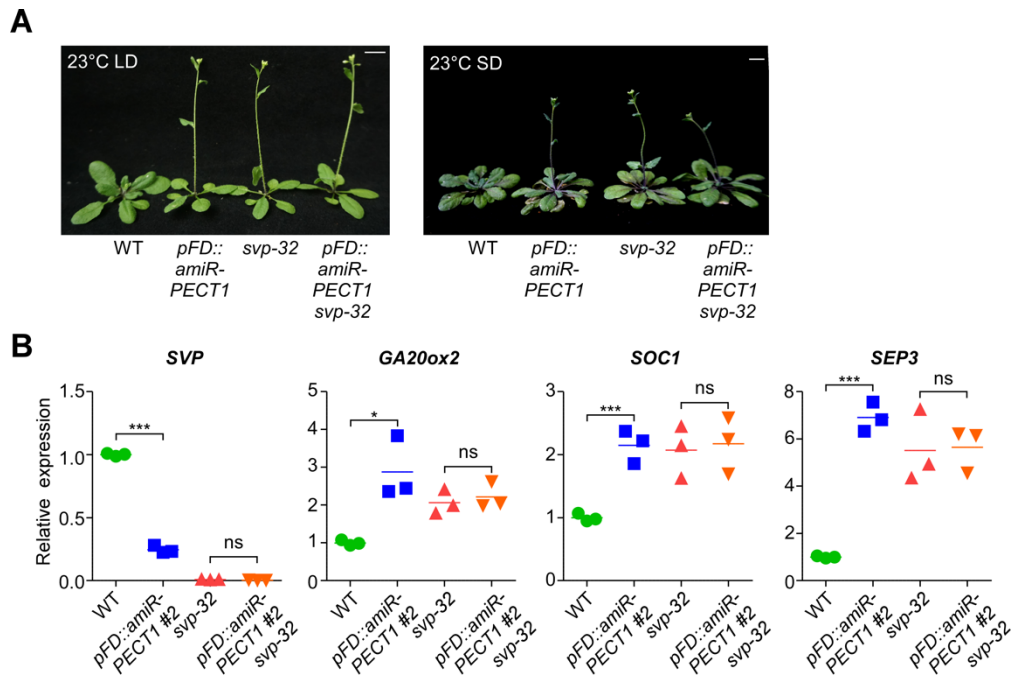

**Figure S10.** The morphology (**A**) and mRNA levels of *SVP*, *GA20ox2*, *SOC1*, and *SEP3* in the SAM-enriched samples (**B**) of *pFD::amiR-PECT1 svp-32* plants under 23°C SD conditions (ZT8). Asterisks represent significant differences derived from Student's *t*-tests (ns: non-significant, \*:  $P \leq 0.05$ , \*\*\*:  $P \leq 0.001$ ).

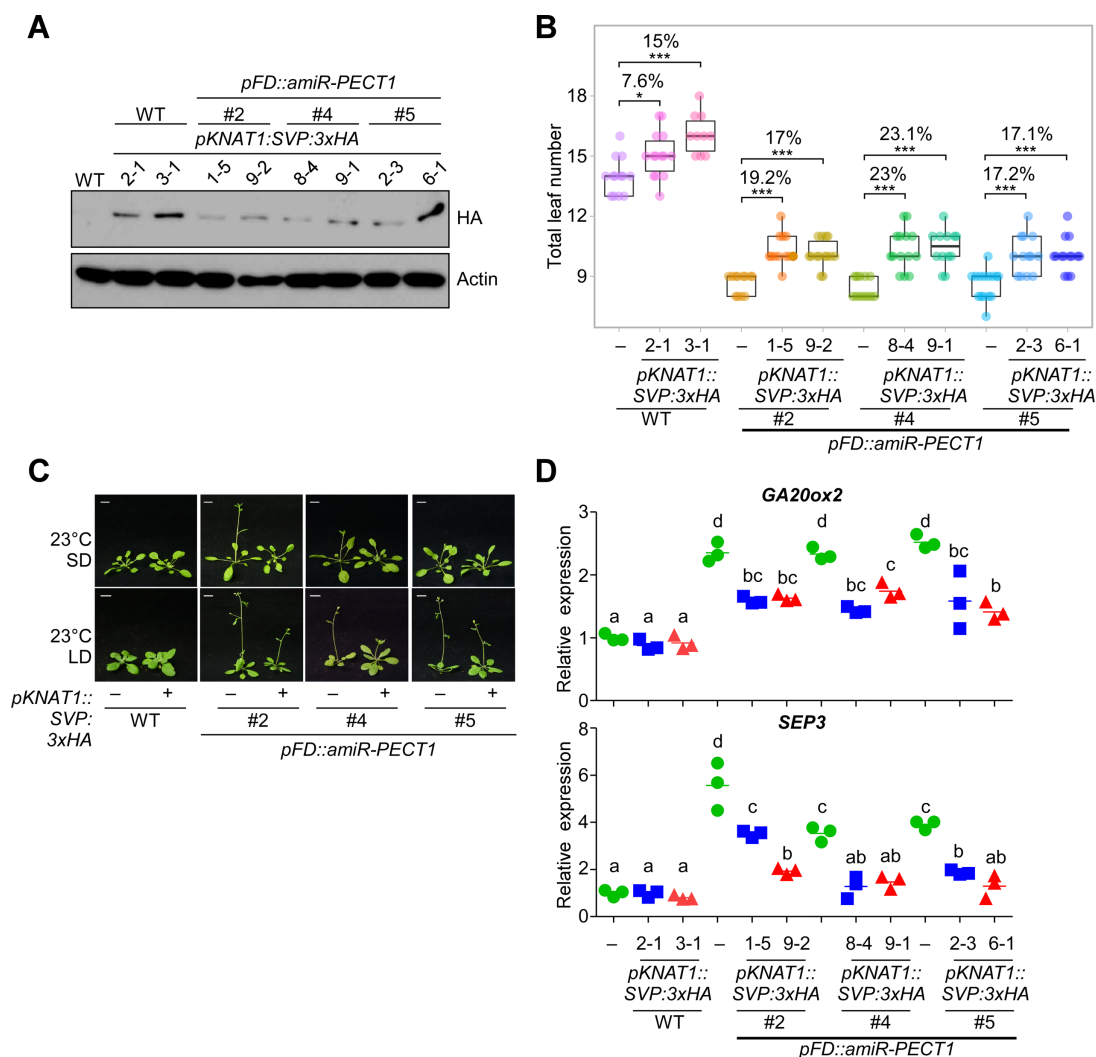

**Figure S11. (A)** Confirmation of SVP-3×HA protein expression in *pKNAT1::SVP:3×HA* transgenic lines. **(B)** Total leaf number at flowering of *pKNAT1::SVP:3×HA pFD::amiR-PECT1* plants under 23°C LD conditions. **(C)** Morphology of *pKNAT1::SVP:3×HA* transgenic lines under 23°C SD and LD conditions. **(D)** The mRNA levels of *GA20ox2* and *SEP3* in the SAM-enriched samples of *pKNAT1::SVP:3×HA* transgenic lines under 23°C SD conditions. Asterisks represent significant differences derived from Student's *t*-tests (\*:  $P \leq 0.05$ , \*\*\*:  $P \leq 0.001$ ), and different lowercase letters represent significant differences derived from one-way ANOVA followed by Duncan's multiple range tests ( $P \leq 0.01$ ).

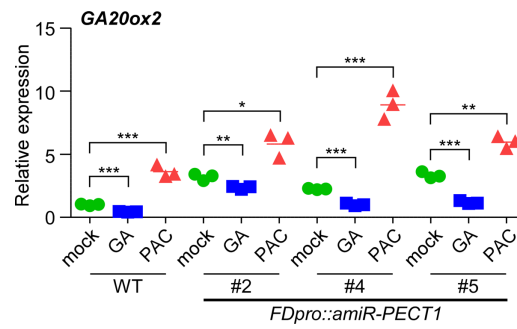

**Figure S12.** The mRNA levels of *GA20ox2* in *pFD::amiR-PECT1* plants under 23°C SD conditions upon 50  $\mu$ M GA<sub>3</sub> and 5  $\mu$ M paclobutrazol (PAC) treatment. Asterisks represent significant differences derived from one-way ANOVA followed by Dunnett's multiple comparison tests (\*:  $P \leq 0.05$ , \*\*:  $P \leq 0.01$ , \*\*\*:  $P \leq 0.001$ ).

**Table S1.** Flowering times of mutants and transgenic lines used in this study.

[Click here to Download Table S1](#)

**Table S2.** List of DEGs (fold change > 2 and *P*-value < 0.01) of *pFD::amiR-PECT1* SAM-enriched samples under 23°C SD conditions (ZT8; 10 and 16 days after germination).

[Click here to Download Table S2](#)

**Table S3.** Primers used in this study.

[Click here to Download Table S3](#)

**Table S4.** Selected monitoring conditions for GAs and deuterium isotope-labeled GAs.

| Analytes                                        | Molecular ions | Fragment ions | Retention time (min) | Collision energy (eV) |
|-------------------------------------------------|----------------|---------------|----------------------|-----------------------|
| GA <sub>3</sub>                                 | 345            | 239           | 0.5                  | 14                    |
| GA <sub>4</sub>                                 | 331            | 257           | 0.7                  | 10                    |
| [ <sup>2</sup> H <sub>2</sub> ]-GA <sub>4</sub> | 333            | 259           | 0.7                  | 10                    |
| GA <sub>5</sub>                                 | 329            | 145           | 0.2                  | 15                    |
